# Supplementary material for: Control of reactivity of constitutional isomers of pentafluorophenyl ethynylbenzoates for the synthesis of functional poly(phenylacetylenes)
Source: Royal Society of Chemistry journal article supplement (doi:10.1039/c2py00503d), 2011-12-16
Supplement: c2py00503d.pdf [file c2py00503d.pdf]

(Supporting Information)

**Control of reactivity of constitutional isomers of  
pentafluorophenyl ester ethynylbenzoates for the synthesis of  
functional poly(phenylacetylenes)**

Anja C. Pauly<sup>a</sup>, and Patrick Theato<sup>\*a,b</sup>

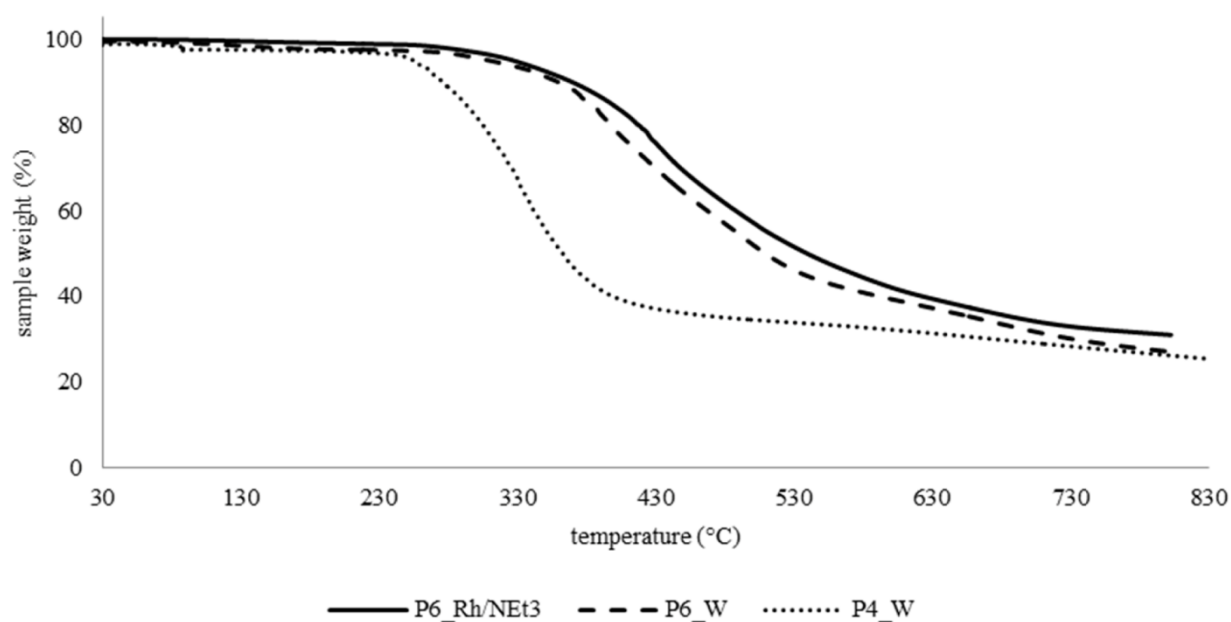

**Figure S1** Thermogravimetric analysis of P6\_Rh/NEt<sub>3</sub>, P6\_W and P4\_W.

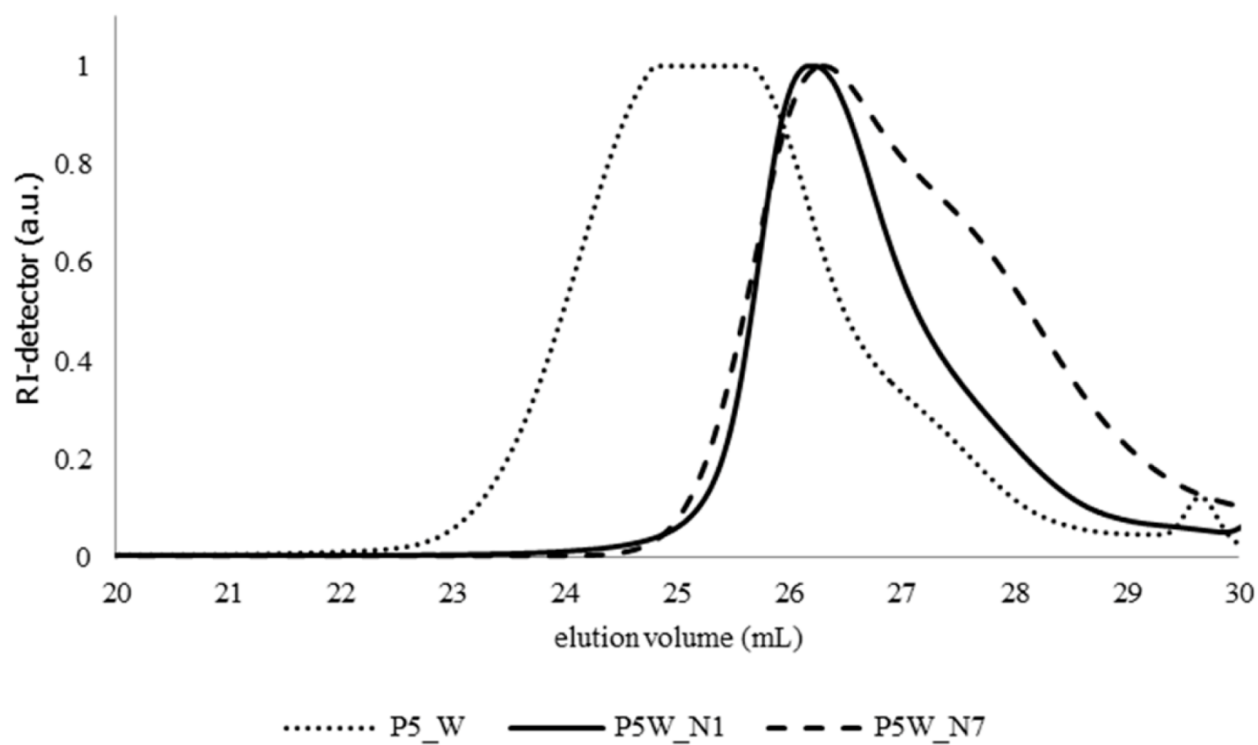

**Figure S2** Gel permeation chromatograms of **P5\_W**, **P5W\_N1** and **P5W\_N7** showing the shift in molecular weight after conversion with amines.
